# Supplementary material for: Exploring the Interaction of Curaxin CBL0137 with G-Quadruplex DNA Oligomers
Source: MDPI journal article supplement (doi:10.3390/ijms22126476), 2021-06-17
Supplement: s1 [file s1]

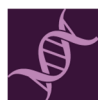

## SUPPLEMENTARY MATERIALS

### Exploring the Interaction of curaxin CBL0137 with G-quadruplex DNA oligomers

Sabrina Dallavalle <sup>1,2</sup>, Luce M. Mattio <sup>1</sup>, Roberto Artali <sup>3</sup>, Loana Musso <sup>1</sup>, Anna Aviñó <sup>4</sup>, Carme Fàbrega<sup>4</sup>, Ramon Eritja <sup>4</sup>, Raimundo Gargallo <sup>5</sup> and Stefania Mazzini<sup>1\*</sup>

<sup>1</sup> Department of Food, Environmental and Nutritional Sciences (DEFENS), University of Milan (Università degli Studi di Milano), Milan, Italy; [sabrina.dallavalle@unimi.it](mailto:sabrina.dallavalle@unimi.it); [luce.mattio@unimi.it](mailto:luce.mattio@unimi.it); [loana.musso@unimi.it](mailto:loana.musso@unimi.it); [stefania.mazzini@unimi.it](mailto:stefania.mazzini@unimi.it)

<sup>2</sup> National Institute of Fundamental Studies, Kandy 20000, Sri Lanka

<sup>3</sup> Scientia Advice di Roberto Artali, 20832 Desio, MB, Italy; [roberto.artali@scientia-advice.com](mailto:roberto.artali@scientia-advice.com)

<sup>4</sup> Institute for Advanced Chemistry of Catalonia (IQAC), CSIC, Networking Center on Bioengineering, Biomaterials and Nanomedicine (CIBER-BBN), Barcelona, Spain; [aaagma@cid.csic.es](mailto:aaagma@cid.csic.es); [recgma@cid.csic.es](mailto:recgma@cid.csic.es)

<sup>5</sup> Department of Chemical Engineering and Analytical Chemistry, University of Barcelona, Barcelona, Spain; [raimon\\_gargallo@ub.edu](mailto:raimon_gargallo@ub.edu)

\* Correspondence: [Stefania.mazzini@unimi.it](mailto:Stefania.mazzini@unimi.it)

## Contents:

**Figure S1.** Inter-residue NOE interactions between aromatic H8 and H1 imino protons of Pu22T14T23. Some intermolecular NOE are also reported.

**Figure S2.** Melting experiments of Pu22T14T23. (a) CD spectra measured along the melting experiment of Pu22T14T23. (b) CD spectra measured along the melting experiment of a mixture of Pu22T14T23 and curaxine (1:3 ratio). (c) Ellipticity traces at 265 nm from both experiments.

**Figure S3.** Melting experiments of Pu22T14T23 in 5mM potassium phosphate buffer, pH 7.1, without KCl. In yellow CD spectra measured along the melting experiment of Pu22T14T23; in grey CD spectra measured along the melting experiment of a mixture of Pu22T14T23 and curaxine (1:3 ratio).

**Figure S4.** Titration of Pu22T14T23 with curaxin. (a) Experimental spectra measured along the titration. Numbers in inset indicate the DNA:curaxin ratio. (b) Experimental (symbols) and fitted (line) fluorescence at 450 nm. A 1:2 (DNA:curaxin) stoichiometry was used to fit the data.

**Figure S5.** Titration of d(CGTACG)<sub>2</sub> with curaxin. (a) Experimental spectra measured along the titration. Numbers in inset indicate the DNA:curaxin ratio. (b) Experimental (symbols) and fitted (line) fluorescence at 450 nm. A 1:1 (DNA:curaxin) stoichiometry was used to fit the data.

**Figure S6.** Titration of ss 5'-CTCTCTACTACCCTTCTGCTC-3' with curaxin. Experimental spectra measured along the titration. Numbers in inset indicate the DNA:curaxin ratio.

**Figure S7.** (a) Schematic representation of d(CGTACG)<sub>2</sub>; (b) imino protons region of the 1D NMR titration spectra d(CGTACG)<sub>2</sub> with curaxin.

**Figure S8.** <sup>31</sup>P spectra and schematic representation of (a) d(CGATCG)<sub>2</sub> and (b) d(AATT)<sub>2</sub> duplexes at 15°C in 10 mM NaH<sub>2</sub>PO<sub>4</sub>, 100 mM NaCl, pH 7.0, 10% D<sub>2</sub>O at different [drug]/[DNA] ratios.

**Table S1.** <sup>1</sup>H chemical shift assignments of curaxin in absence and in presence of d(T<sub>2</sub>AG<sub>3</sub>T)<sub>4</sub> and Pu22T14T23.

**Table S2.** <sup>1</sup>H chemical shift values of d(T<sub>2</sub>AG<sub>3</sub>T)<sub>4</sub> in the presence of curaxin.

**Table S3.** Selected <sup>1</sup>H chemical shift values for the complex of curaxin with Pu22T14T23.<sup>a</sup>

**Table S4.** Inter-residue NOE interactions of Pu22T14T23 in the complex with curaxin

**Table S5.** Selected  $^1\text{H}$  chemical shift values for the complex of curaxin with and d(CGTACG)<sub>2</sub>.

**Table S6.** Intermolecular NOE in the curaxin-d(CGTACG)<sub>2</sub> complex.

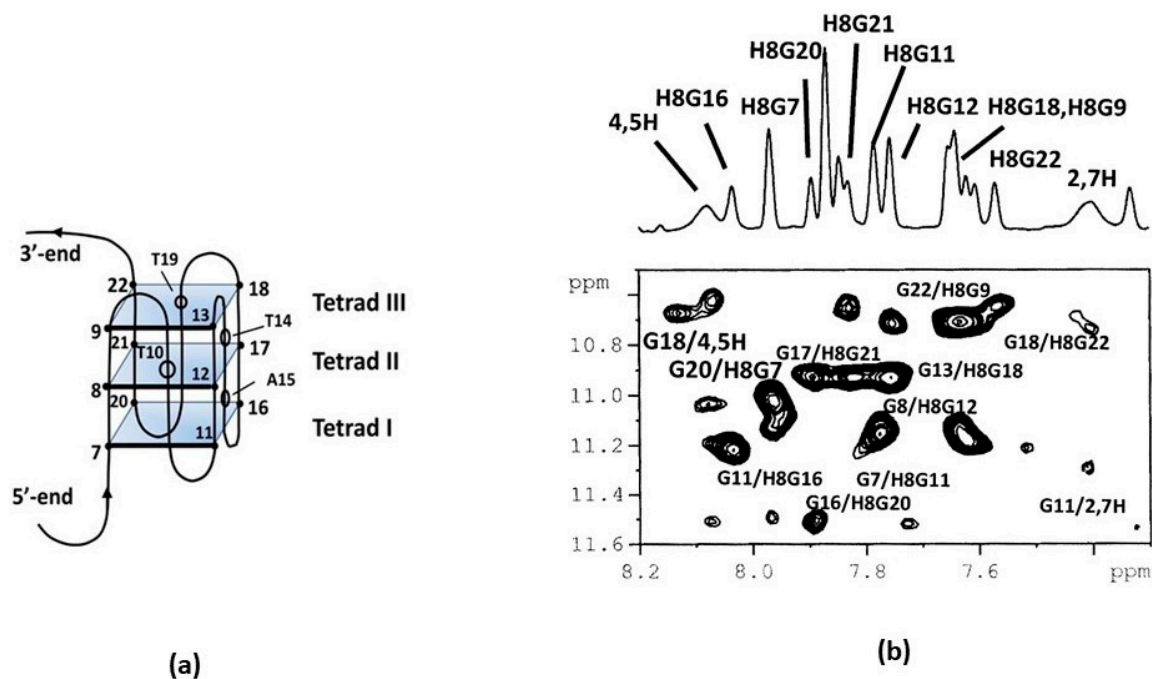

**Figure S1.** (a) Schematic representation of Pu22T14T23; (b) inter-residue NOE interactions between aromatic H8 and H1 imino protons of Pu22T14T23. Some intermolecular NOE are also reported.

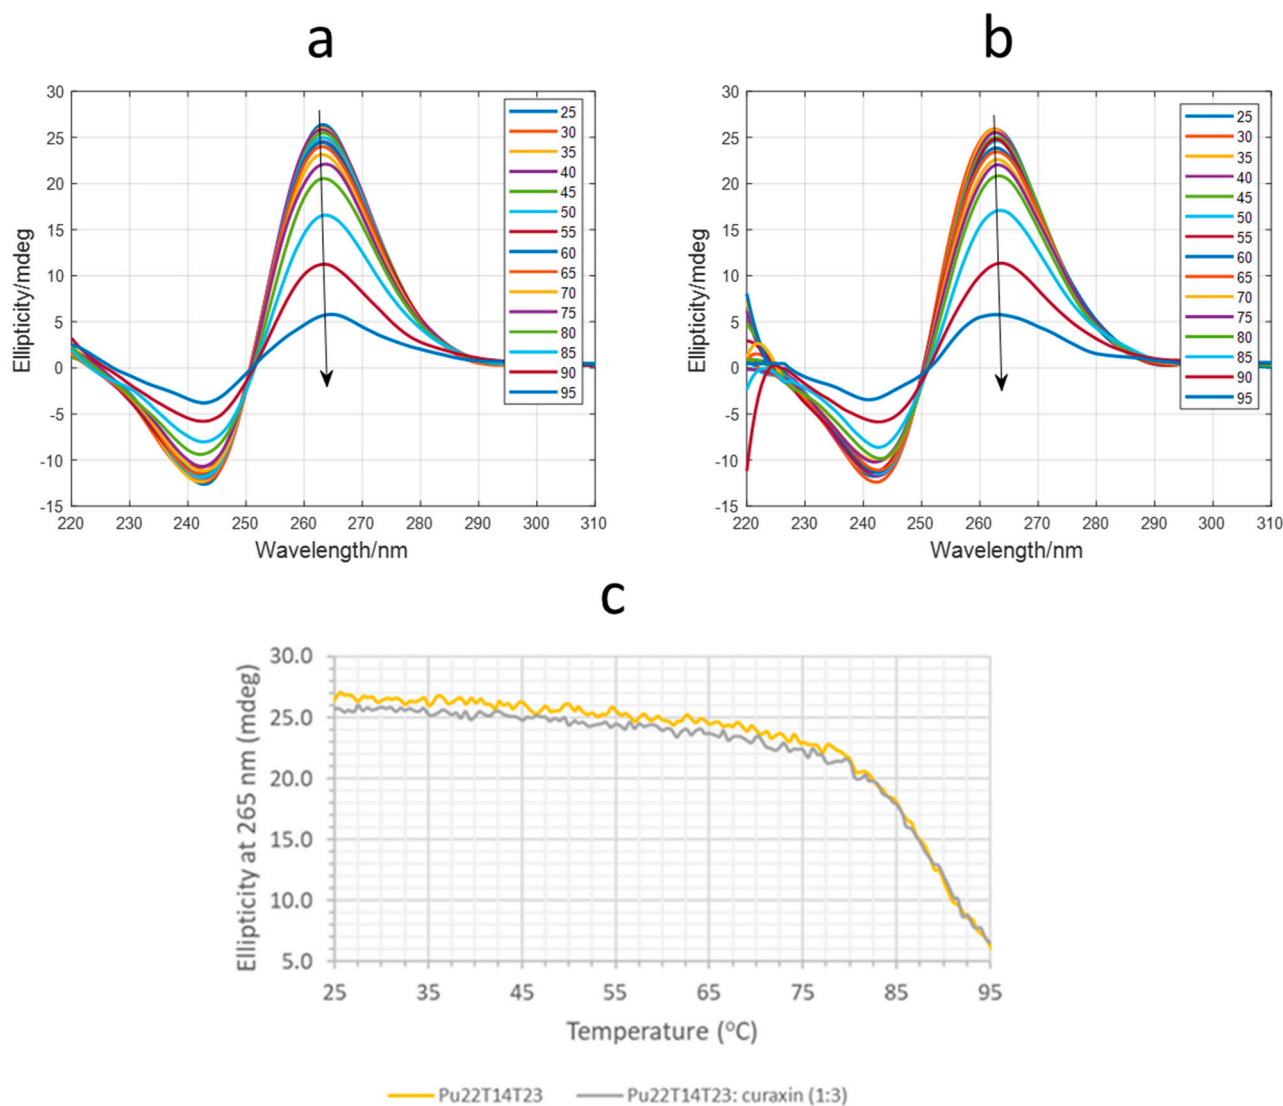

**Figure S2.** Melting experiments of Pu22T14T23. (a) CD spectra measured along the melting experiment of Pu22T14T23. (b) CD spectra measured along the melting experiment of a mixture of Pu22T14T23 and curaxine (1:3 ratio). (c) Ellipticity traces at 265 nm from both experiments.

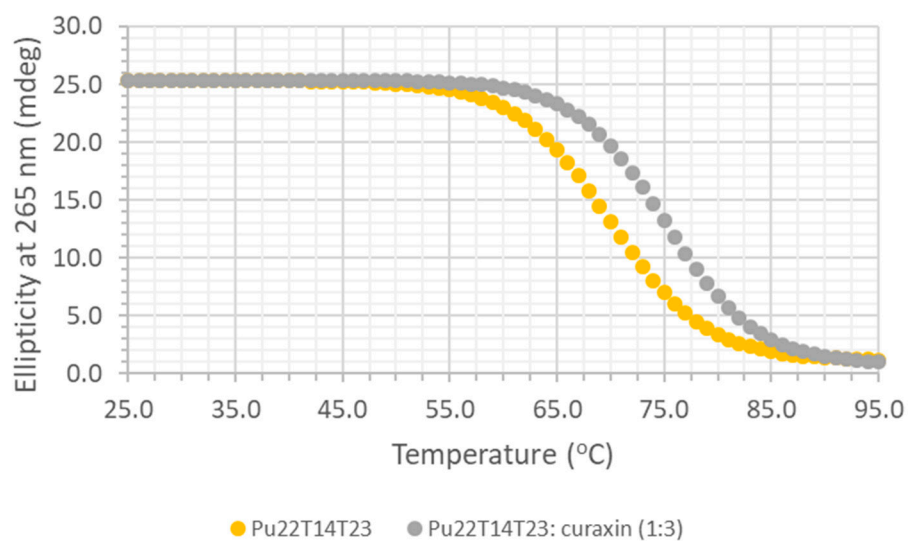

**Figure S3.** Melting experiments of Pu22T14T23 in 5mM potassium phosphate buffer, pH 7.1, without KCl. In yellow CD spectra measured along the melting experiment of Pu22T14T23; in grey CD spectra measured along the melting experiment of a mixture of Pu22T14T23 and curaxine (1:3 ratio)

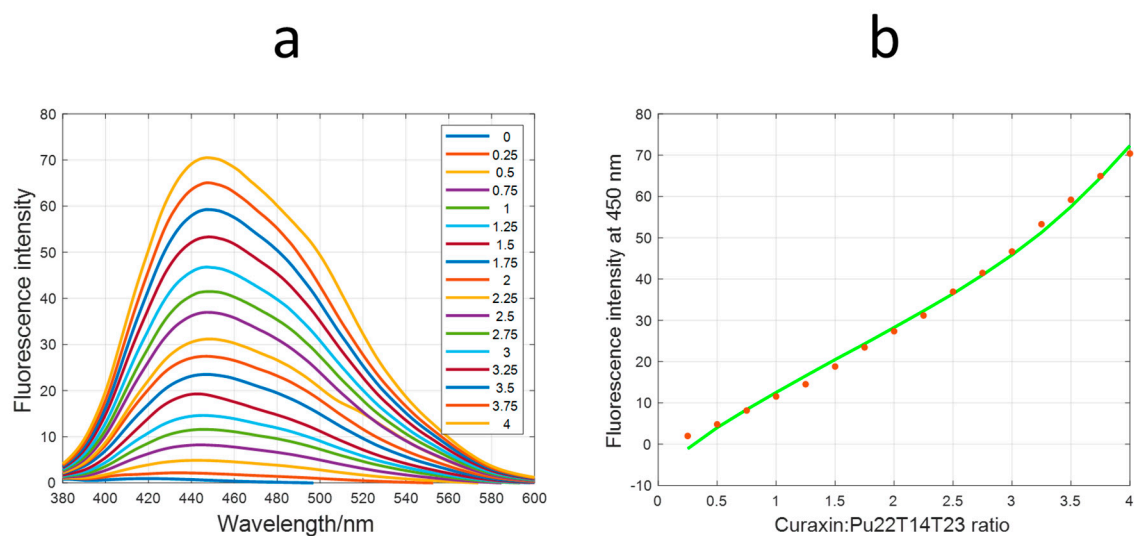

**Figure S4.** Titration of Pu22T14T23 with curaxin. (a) Experimental spectra measured along the titration. Numbers in inset indicate the DNA:curaxin ratio. (b) Experimental (symbols) and fitted (line) fluorescence at 450 nm. A 1:2 (DNA:curaxin) stoichiometry was used to fit the data.

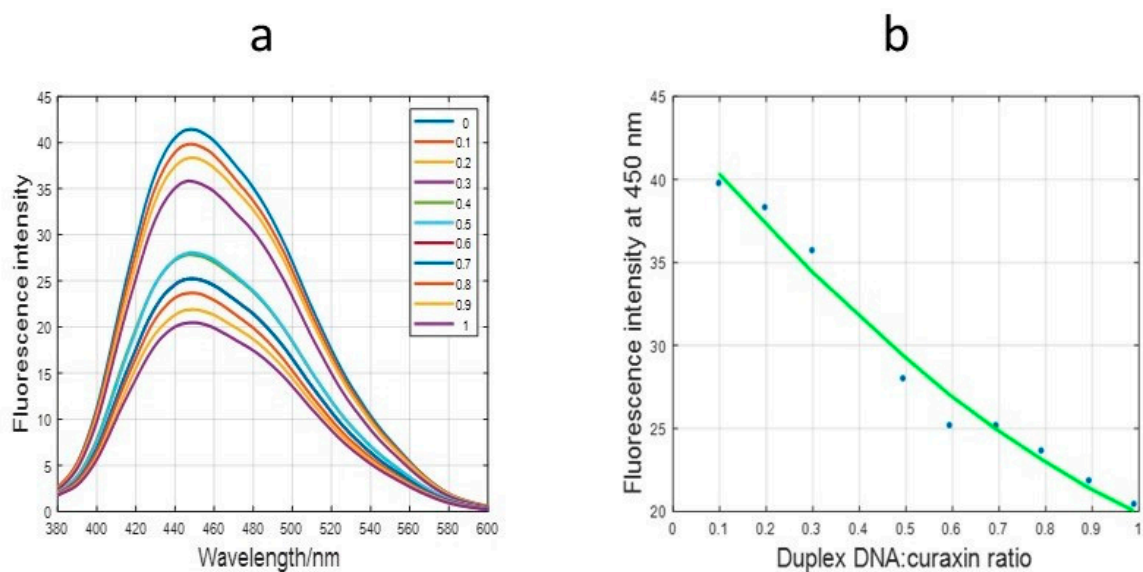

**Figure S5.** Titration of d(CGTACG)<sub>2</sub> with curaxin. (a) Experimental spectra measured along the titration. Numbers in inset indicate the DNA:curaxin ratio. (b) Experimental (symbols) and fitted (line) fluorescence at 450 nm. A 1:1 (DNA:curaxin) stoichiometry was used to fit the data.

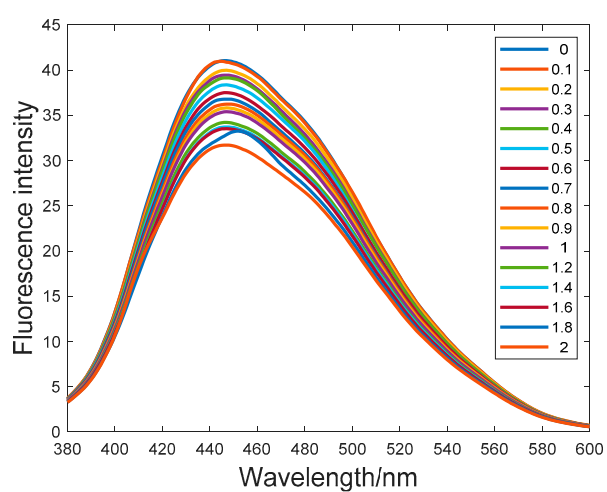

**Figure S6.** Titration of ss 5'-CTCTCTACTACCCTTCTGCTC-3' with curaxin. Experimental spectra measured along the titration. Numbers in inset indicate the DNA:curaxin ratio.

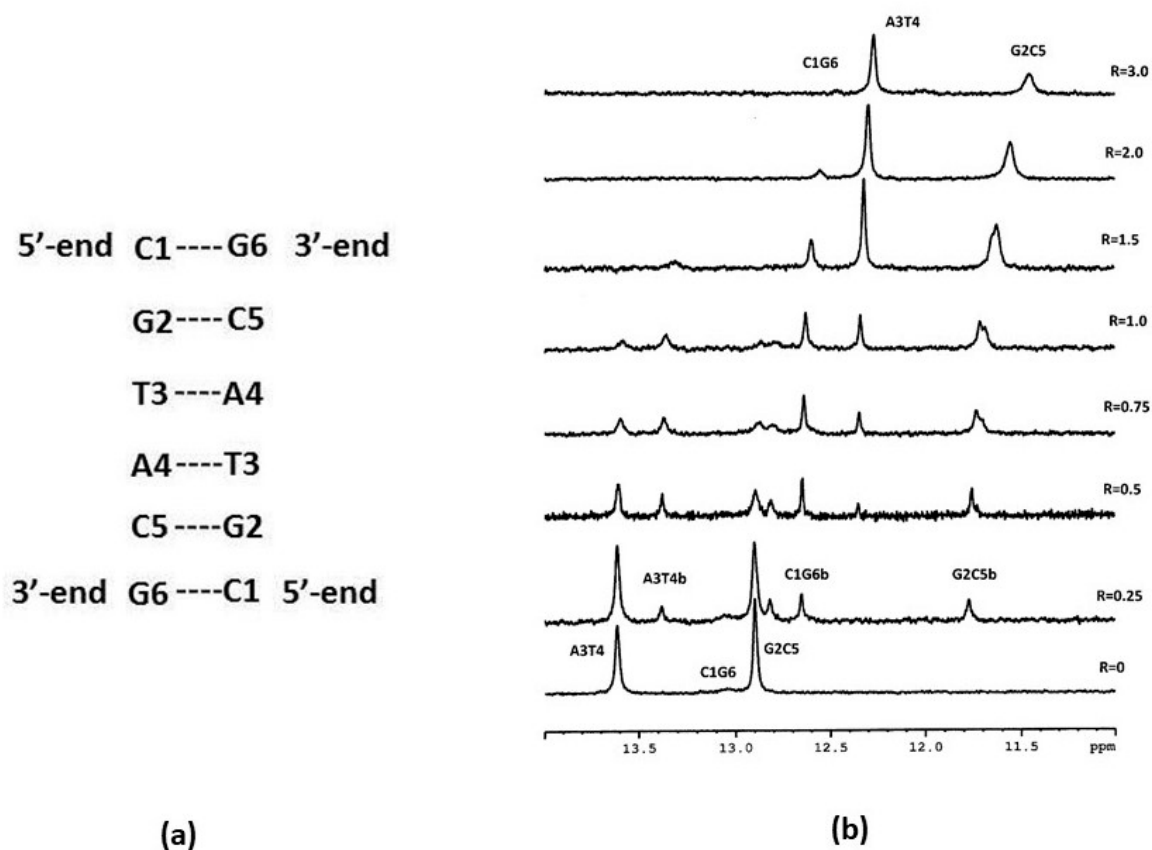

**Figure S7.** (a) Schematic representation of  $d(CGTACG)_2$ ; (b) imino protons region of the 1D NMR titration spectra  $d(CGTACG)_2$  with curaxin.

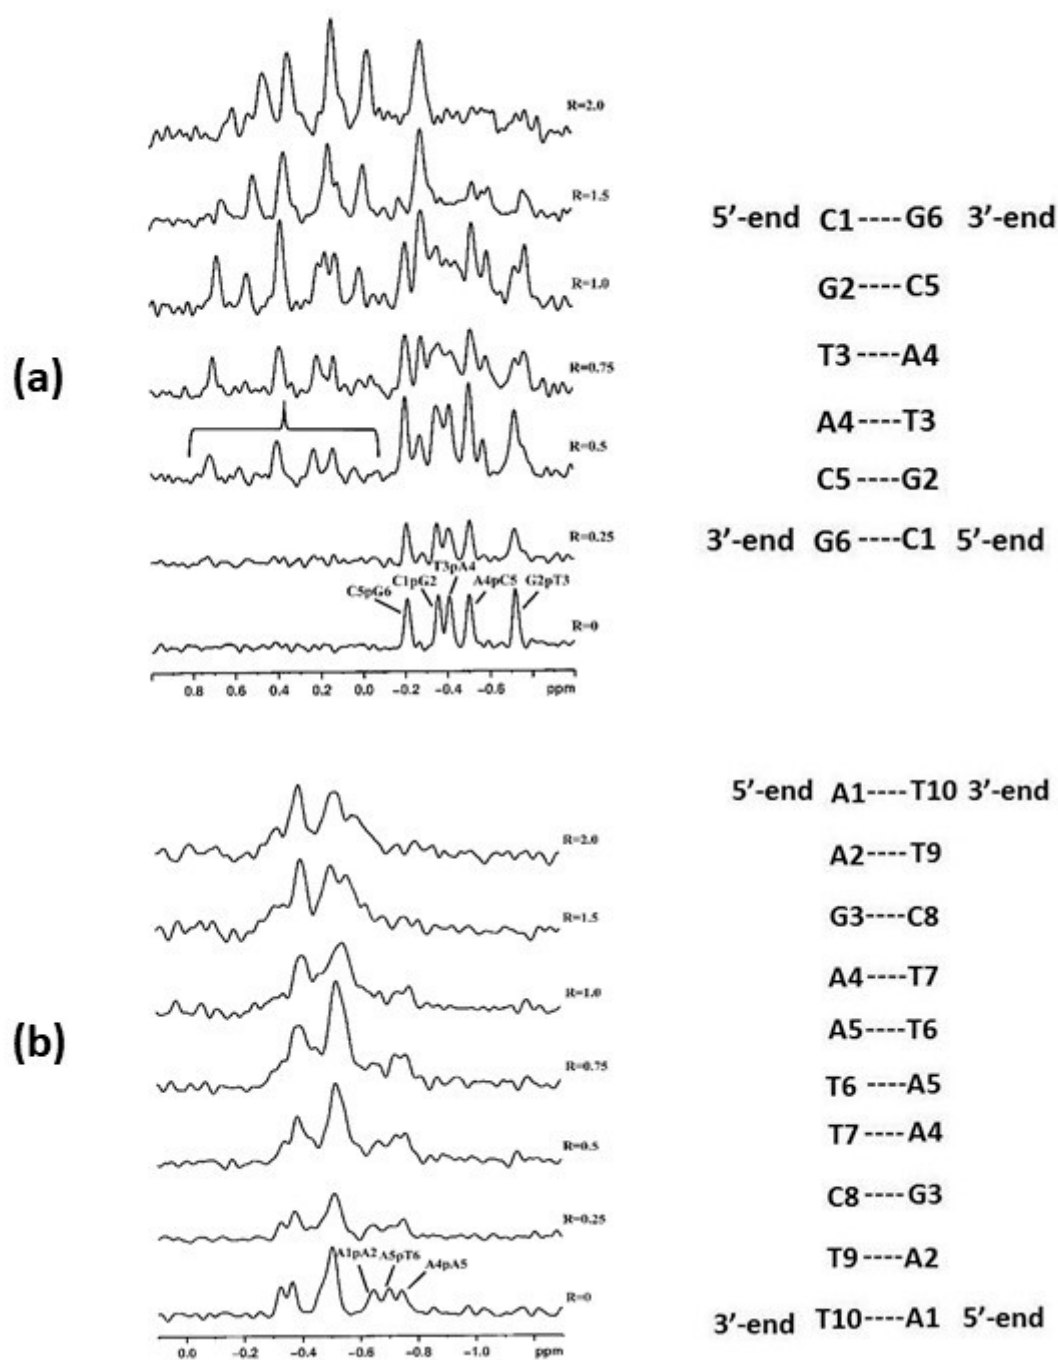

**Figure S8.**  $^{31}\text{P}$  spectra and schematic representation of (a)  $\text{d}(\text{CGATCG})_2$  and (b)  $\text{d}(\text{AATT})_2$  duplexes at  $15^\circ\text{C}$  in 10 mM  $\text{NaH}_2\text{PO}_4$ , 100 mM  $\text{NaCl}$ , pH 7.0, 10%  $\text{D}_2\text{O}$  at different  $[\text{drug}]/[\text{DNA}]$  ratios.



**Table S1.**  $^1\text{H}$  chemical shift assignments of curaxin in absence and in presence of  $\text{d}(\text{T}_2\text{AG}_3\text{T})_4$ <sup>a</sup> and Pu22T14T23<sup>b</sup>

| protons                      | $\delta$ curaxin<br>free<br>(ppm) | $\delta$ $\text{d}(\text{T}_2\text{AG}_3\text{T})_4$ /curaxin<br>(ppm) | $\Delta\delta^b$ | $\delta$ Pu22T14T23<br>/curaxin<br>(ppm) | $\Delta\delta^b$ |
|------------------------------|-----------------------------------|------------------------------------------------------------------------|------------------|------------------------------------------|------------------|
| 1,8-H                        | 7.50                              | 7.00                                                                   | -0.50            | 7.00                                     | -0.50            |
| 2,7-H                        | 8.05                              | 7.44                                                                   | -0.61            | 7.41                                     | -0.64            |
| 4,5-H                        | 8.41                              | 8.17                                                                   | -0.24            | 8.08                                     | -0.33            |
| $\text{CH}_2(9)$             | 4.55                              | 4.19                                                                   | -0.36            | 4.32                                     | -0.23            |
| $\text{CH}_2$                | 3.42                              | 3.24                                                                   | -0.18            | 3.32                                     | -0.10            |
| CH<br>(isopropyl)            | 3.42                              | 3.24                                                                   | -0.18            | 3.32                                     | -0.10            |
| $\text{CH}_3\text{CO}$       | 2.68                              | 2.26                                                                   | -0.42            | 2.27                                     | -0.41            |
| $\text{CH}_3$<br>(isopropyl) | 1.30                              | 1.16                                                                   | -0.14            | 1.19                                     | -0.11            |

<sup>a</sup> Acquired at 25°C in  $\text{H}_2\text{O}$ - $\text{D}_2\text{O}$  (90:10 v/v), 25 mM K-phosphate buffer, 150 mM KCl, 1mMEDTA, pH 6.7. <sup>b</sup>Acquired at 25°C in  $\text{H}_2\text{O}$ - $\text{D}_2\text{O}$  (90:10 v/v), 25 mM  $\text{KH}_2\text{PO}_4$ , 70 mM KCl, pH 6.9. <sup>c</sup>  $\Delta\delta = \delta_{\text{bound}} - \delta_{\text{free}}$

**Table S2.**  $^1\text{H}$  chemical shift values of  $\text{d}(\text{T}_2\text{AG}_3\text{T})_4$  in the presence of curaxin<sup>a</sup>

| $\text{d}(\text{T}_2\text{AG}_3\text{T})_4$<br>/curaxin | H1<br>free | bound | $\Delta\delta$ | H8/H6<br>free | bound | $\Delta\delta$ | H2/Me<br>free | bound | $\Delta\delta$ |
|---------------------------------------------------------|------------|-------|----------------|---------------|-------|----------------|---------------|-------|----------------|
| T1                                                      | -          | -     | -              | 7.39          | 7.49  | 0.10           | 1.66          | 1.68  | 0.02           |
| T2                                                      | -          | -     | -              | 7.30          | 7.31  | 0.01           | 1.76          | 1.77  | 0.01           |
| A3                                                      | -          | -     |                | 8.43          | 8.38  | -0.05          | 8.09          | n.d.  |                |
| G4                                                      | 11.61      | 11.33 | <b>-0.28</b>   | 7.95          | 7.78  | <b>-0.17</b>   | -             | -     |                |
| G5                                                      | 11.23      | 11.00 | <b>-0.23</b>   | 7.79          | 7.61  | <b>-0.18</b>   | -             | -     |                |
| G6                                                      | 11.15      | 10.60 | <b>-0.55</b>   | 7.70          | 7.69  | -0.01          | -             | -     |                |
| T7                                                      | -          | -     | -              | 7.36          | 7.49  | <b>0.13</b>    | 1.60          | 1.68  | 0.02           |

| $\text{d}(\text{T}_2\text{AG}_3\text{T})_4$<br>/curaxin | H1'<br>free | bound | $\Delta\delta$ | H2'/H2''<br>free | bound     | $\Delta\delta$ |
|---------------------------------------------------------|-------------|-------|----------------|------------------|-----------|----------------|
| T1                                                      | 6.00        | 6.11  | 0.11           | 2.10;2.34        | 2.27;2.27 | 0.17; -0.07    |
| T2                                                      | 6.23        | 5.93  | -0.30          | 2.03;2.32        | 2.06;2.33 | 0.03;0.01      |
| A3                                                      | 6.28        | 6.26  | -0.02          | 2.86;2.92        | 2.87;2.87 | 0.01;-0.05     |
| G4                                                      | 6.01        | 5.96  | -0.05          | 2.67;2.91        | 2.60;2.82 | -0.07;-0.03    |
| G5                                                      | 6.03        | 5.99  | -0.04          | 2.66;2.74        | 2.60;2.82 | -0.06;-0.09    |
| G6                                                      | 6.27        | 6.29  | 0.02           | 2.57;2.70        | 2.60;2.69 | 0.03;-0.01     |
| T7                                                      | 6.07        | 6.11  | 0.04           | 2.17;2.19        | 2.27;2.27 | 0.10;0.08      |

| $\text{d}(\text{T}_2\text{AG}_3\text{T})_4$<br>/curaxin | H3'<br>free | bound | $\Delta\delta$ | H4'<br>free | bound | $\Delta\delta$ |
|---------------------------------------------------------|-------------|-------|----------------|-------------|-------|----------------|
| T1                                                      | 4.64        | n.d.  | -              | 4.00        | n.d.  | -              |
| T2                                                      | 4.72        | n.d.  | -              | 4.06        | n.d.  | -              |
| A3                                                      | 5.10        | 5.08  | -0.02          | 4.44        | 4.45  | 0.01           |
| G4                                                      | 5.05        | 4.98  | -0.07          | 4.49        | 4.45  | -0.04          |
| G5                                                      | 5.04        | 4.98  | -0.06          | 4.51        | 4.45  | -0.06          |

|    |      |      |      |      |      |       |
|----|------|------|------|------|------|-------|
| G6 | 4.91 | 4.98 | 0.07 | 4.52 | 4.46 | -0.06 |
| T7 | 4.49 | 5.02 | 0.03 | 4.23 | 4.21 | -0.02 |

| d(T <sub>2</sub> AG <sub>3</sub> T) <sub>4</sub><br>/curaxin | H5'/H5''<br>free | bound     | Δδ           |
|--------------------------------------------------------------|------------------|-----------|--------------|
| T1                                                           | 3.65;3.65        | n.d.      | -            |
| T2                                                           | 3.90;3.90        | n.d.      | -            |
| A3                                                           | 4.15;4.10        | 4.12;4.12 | -0.03, 0.02  |
| G4                                                           | 4.27;4.27        | 4.24;4.24 | -0.03; -0.03 |
| G5                                                           | 4.30;4.30        | 4.27;4.27 | -0.03; -0.03 |
| G6                                                           | 4.27;4.27        | 4.24;4.24 | -0.03; -0.03 |
| T7                                                           | 4.07;4.07        | 4.12;4.12 | 0.05; 0.05   |

<sup>a</sup> Acquired at 25°C in 25 mM KH<sub>2</sub>PO<sub>4</sub>, 150 mM KCl and 1 mM EDTA, pH 6.7, 10% D<sub>2</sub>O, R=2.0

**Table S3 .** Selected <sup>1</sup>H chemical shift values for the complex of curaxin with Pu22T14T23.<sup>a</sup>

|     | H1/H2/Me | Δδ <sup>b</sup> | H6/H8 | Δδ     |
|-----|----------|-----------------|-------|--------|
| T4  | 1.79     | +0.14           | 7.33  | +0.12  |
| G5  | n.d.     | -               | 8.24  | +0.24  |
| A6  | 7.97     | +0.17           | n.d.  | -      |
| G7  | 11.20    | <b>- 0.56</b>   | 7.97  | -0.07  |
| G8  | 10.94    | - 0.28          | 7.60  | -0.12  |
| G9  | 10.30    | -0.30           | 7.71  | -0.11  |
| T10 | n.d.     | -               | n.d.  |        |
| G11 | 11.23    | <b>-0.48</b>    | 7.78  | -0.21  |
| G12 | 11.17    | -0.33           | 7.76  | -0.24  |
| G13 | 10.70    | <b>-0.36</b>    | 7.78  | -0.08  |
| T14 | 1.94     | +0.02           | 7.64  | -0.01  |
| A15 | 8.36     | -0.02           | 8.55  | +0.02  |
| G16 | 11.50    | <b>- 0.40</b>   | 8.04  | -0.07  |
| G17 | 10.93    | - 0.32          | 7.63  | - 0.17 |
| G18 | 10.64    | <b>- 0.38</b>   | 7.66  | - 0.13 |

|     |       |              |      |       |
|-----|-------|--------------|------|-------|
| T19 | 2.00  | +0.01        | 7.86 | 0.00  |
| G20 | 11.03 | -0.24        | 7.90 | 0.00  |
| G21 | 11.13 | -0.24        | 7.83 | -0.08 |
| G22 | 10.72 | <b>-0.32</b> | 7.57 | -0.04 |
| T23 | 1.30  | -0.18        | 7.09 | -0.05 |
| A24 | 7.23  | +0.13        | n.d. | -     |
| A25 | 7.60  | +0.21        | n.d. | -     |

<sup>a</sup> Measured at 25°C in ppm ( $\delta$ ) from external DSS. Solvent H<sub>2</sub>O-D<sub>2</sub>O (90:10 v/v), 25 mM K-phosphate buffer, 70 mM KCl, pH 6.9,  $R = 2.0$ .

<sup>b</sup>  $\Delta\delta = \delta_{\text{bound}} - \delta_{\text{free}}$

**Table S4.** Inter-residue NOE interactions of Pu22T14T23 in the complex with curaxin<sup>a</sup>

| <i>G-tetrad I</i> | <i>G-tetrad II</i> | <i>Tetrad III</i> |
|-------------------|--------------------|-------------------|
| G7H1-G11H8        | G8H1-G12H8         | G9H1-G13H8        |
| G11H1-G16H8       | G12H1-G17H8        | G13H1-G18H8       |
| G16H1-G20H8       | G17H1-G21H8        | G18H1-G22H8       |
| G20H1-G7H8        | G21H1-G8H8         | G22H1-G9H8        |

<sup>a</sup> Acquired at 25°C in H<sub>2</sub>O-D<sub>2</sub>O (90:10 v/v), 25 mM K-phosphate buffer, 70 mM KCl, pH 6.9;  $R=2.0$

**Table S5.** Selected <sup>1</sup>H chemical shift values for the complex of curaxin with and d(CGTACG)<sub>2</sub><sup>a</sup>

| "CG" | H2/H5/CH <sub>3</sub> | $\Delta\delta^b$ | H6/H8 | $\Delta\delta^b$ |
|------|-----------------------|------------------|-------|------------------|
| C1   | 5.44                  |                  | 7.35  | -0.12            |
| G2   | -                     | -                | 7.53  | -0.12            |
| T3   | 1.61                  |                  | 7.15  | -0.07            |

|      |       |              |      |       |
|------|-------|--------------|------|-------|
| A4   | 6.97  |              | 8.06 | -0.06 |
| C5   | 5.52  |              | 7.32 | -0.11 |
| G6   | -     |              | 7.79 | -0.09 |
|      | NH    |              |      |       |
| C1G6 | 12.45 | -0.60        |      |       |
| G2C5 | 11.45 | <b>-1.45</b> |      |       |
| T3A4 | 12.27 | <b>-1.34</b> |      |       |

<sup>a</sup> Measured at 15°C in ppm ( $\delta$ ) from external DSS. Solvent H<sub>2</sub>O-D<sub>2</sub>O (90:10 v/v), of 0.1 M NaCl and 10 mM sodium phosphate buffer solution, pH = 7.0; R = 3.0. <sup>b</sup> $\Delta\delta = \delta_{\text{bound}} - \delta_{\text{free}}$ ; <sup>c</sup>Very broad signal.

**Table S6.** Intermolecular NOE in the curaxin-d(CGTACG)<sub>2</sub><sup>a</sup> complex

| NOE                 |                        |
|---------------------|------------------------|
| Curaxin             | d(CGTACG) <sub>2</sub> |
| 1,8-H               | G2H8                   |
| 2,7-H               | G2H8                   |
| 4,5-H               | G2H8                   |
| CH <sub>3</sub> iso | A4H8                   |
| CH <sub>3</sub> CO  | A4H8                   |
| 1,8-H               | A4H8                   |
| 2,7-H               | A4H8                   |
| 1,8-H               | A4H8                   |
| 2,7-H               | T3H6                   |
| 4,5-H               | T3H6                   |

<sup>a</sup> Measured at 15°C in ppm ( $\delta$ ) from external DSS. Solvent H<sub>2</sub>O-D<sub>2</sub>O (90:10 v/v), of 0.1 M NaCl and 10 mM sodium phosphate buffer solution, pH = 7.0; R = 3.0.
